# Supplementary material for: Time for bed: associations with cognitive performance in 7-year-old children: a longitudinal population-based study
Source: HighWire-hosted journal article supplement (doi:10.1136/jech-2012-202024), 2013-07-08
Supplement: jech-2012-202024_press_release.pdf [file jech-2012-202024_press_release.pdf]

## JOURNAL OF EPIDEMIOLOGY AND COMMUNITY HEALTH

### Irregular bed times curb young kids' brain power

*And may have knock-on effects on health throughout life*

**[Time for bed: associations with cognitive performance in 7-year old children: a longitudinal population-based study Online First doi 10.1136/jech-2012-202024]**

Going to bed at different times every night throughout early childhood seems to curb children's brain power, finds a large, long term study published online in the **Journal of Epidemiology and Community Health**.

Given the importance of early childhood development on subsequent health, there may be knock-on effects across the life course, suggest the authors.

The authors looked at whether bedtimes in early childhood were related to brain power in more than 11,000 seven year olds, all of whom were part of the UK Millennium Cohort Study (MCS).

MCS is a nationally representative long term study of UK children born between September 2000 and January 2002, and the research drew on regular surveys and home visits made when the children were 3, 5, and 7, to find out about family routines, including bedtimes.

The authors wanted to know whether the time a child went to bed, and the consistency of bed-times, had any impact on intellectual performance, measured by validated test scores for reading, maths, and spatial awareness.

And they wanted to know if the effects were cumulative and/or whether any particular periods during early childhood were more critical than others.

Irregular bedtimes were most common at the age of 3, when around one in five children went to bed at varying times. By the age of 7, more than half the children went to bed regularly between 7.30 and 8.30 pm.

Children whose bedtimes were irregular or who went to bed after 9 pm came from more socially disadvantaged backgrounds, the findings showed.

When they were 7, girls who had irregular bedtimes had lower scores on all three aspects of intellect assessed, after taking account of other potentially influential factors, than children with regular bedtimes. But this was not the case in 7 year old boys.

Irregular bedtimes by the age of 5 were not associated with poorer brain power in girls or boys at the age of 7. But irregular bedtimes at 3 years of age were associated with lower scores in reading, maths, and spatial awareness in both boys and girls, suggesting that around the age of 3 could be a sensitive period for cognitive development.

The impact of irregular bedtimes seemed to be cumulative.

Girls who had never had regular bedtimes at ages 3, 5, and 7 had significantly lower reading, maths and spatial awareness scores than girls who had had consistent bedtimes. The impact was the same in boys, but for any two of the three time points.

The authors point out that irregular bedtimes could disrupt natural body rhythms and cause sleep deprivation, so undermining the plasticity of the brain and the ability to acquire and retain information. "Sleep is the price we pay for plasticity on the prior day and the investment needed to allow learning fresh the next day," they write. And they add: "Early child development has profound influences on health and wellbeing across the life course. Therefore, reduced or disrupted sleep, especially if it occurs at key times in development, could have important impacts on health throughout life."
